# Supplementary material for: Cumulative Deficits Frailty Index and Relationship Status Predict Survival in Multiple Myeloma
Source: Research Square preprint supplement (doi:10.21203/rs.3.rs-4373874/v1), 2024-05-15
Supplement: Supplementary file 1 [file 1eacb1ca9f1a1b83892bf974.pdf]

**Supplemental Figure 1:**

**Using a black pen, please answer ALL questions by filling in the appropriate circles like ●**

What is your current relationship status?

- ☐ Divorced
- ☐ Married
- ☐ Separated
- ☐ Single
- ☐ Widowed
- ☐ Committed relationship
- ☐ Other

With whom do you live?

- ☐ Live alone
- ☐ Spouse
- ☐ Domestic partner
- ☐ Family
- ☐ Other

Can you climb two flights of stairs without stopping to rest?

- ☐ Yes, with no difficulty
- ☐ Yes, with difficulty
- ☐ No, can't do it at all
- ☐ Don't know

Are you dependent on a device for normal breathing (CPAP, nasal oxygen)?

- ☐ No
- ☐ Yes

Do you depend on any assistive devices such as a cane, wheelchair, braces, walker, or assistance from other people to perform activities important to you in your daily life?

- ☐ No
- ☐ Yes

Fill in the circle to the left of each activity which you have difficulty performing on your own?

- ☐ Preparing meals
- ☐ Feeding yourself
- ☐ Dressing
- ☐ Housekeeping
- ☐ Using the toilet
- ☐ Climbing stairs
- ☐ Bathing
- ☐ Walking
- ☐ Using transportation
- ☐ Getting in and out of bed
- ☐ Managing medications
- ☐ No difficulty with any of these activities

**Supplemental figure 2:**

PATIENT REPORTED 3-SYMPTOM SCREEN

FATIGUE (Scale: 0 = no fatigue; 10 = worst fatigue you can imagine):

PAIN (Scale: 0 = no pain; 10 = worst pain you can imagine):

OVERALL QUALITY OF LIFE (Scale: 0 = as bad as can be; 10 = as good as can be):

**Supplemental Table 1:**

|                                     | <b>N=111</b><br><b>(Excluded patients)</b><br><b>Median (IQR) or N(%)</b> | <b>N=515</b><br><b>(Included patients)</b><br><b>Median (IQR) or N(%)</b> |      |
|-------------------------------------|---------------------------------------------------------------------------|---------------------------------------------------------------------------|------|
| <b>Age (years)</b>                  | 67 (59-74)                                                                | 66 (59-74)                                                                | NS   |
| <b>Female</b>                       | 33 (30)                                                                   | 207 (40)                                                                  | 0.04 |
| <b>ISS</b>                          |                                                                           |                                                                           | NS   |
| <b>I</b>                            | 24 (24)                                                                   | 127 (27)                                                                  |      |
| <b>II</b>                           | 45 (46)                                                                   | 182 (38)                                                                  |      |
| <b>III</b>                          | 29 (30)                                                                   | 168 (35)                                                                  |      |
| <b>R-ISS</b>                        |                                                                           |                                                                           | NS   |
| <b>I</b>                            | 20 (21)                                                                   | 83 (19)                                                                   |      |
| <b>II</b>                           | 69 (71)                                                                   | 297 (67)                                                                  |      |
| <b>III</b>                          | 8 (8)                                                                     | 66 (15)                                                                   |      |
| <b>High-Risk FISH abnormalities</b> | 42 (47)                                                                   | 188 (43)                                                                  | NS   |
| <b>Diagnosis after 2013</b>         | 1132 (57)                                                                 | 223 (43)                                                                  |      |
| <b>First-line induction</b>         |                                                                           |                                                                           | NS   |
| <b>PI-based</b>                     | 25 (25)                                                                   | 144 (30)                                                                  |      |
| <b>IMiD-based</b>                   | 44 (43)                                                                   | 200 (42)                                                                  |      |
| <b>PI+IMiD-based</b>                | 21 (21)                                                                   | 104 (22)                                                                  |      |
| <b>Other</b>                        | 12 (12)                                                                   | 27 (6)                                                                    |      |
| <b>Early transplant</b>             | 44 (40)                                                                   | 188 (37)                                                                  | NS   |

**Baseline characteristics of included and excluded patients.** Abbreviations: *CI*: confidence interval, *FISH*: Fluorescence In Situ Hybridization, *IMiD*: immunomodulatory drug, *IQR*: interquartile range, *ISS*: international staging system, *N*: number, *PI*: proteasome inhibitor, *R-ISS*: revised international staging system. NS = not significant.
